# Supplementary material
Source: publisher figshare collection journal article supplement (https://gsajournals.figshare.com/ndownloader/files/14345810)
Supplement: Supplementary file 1 [file 14345810]

Supplemental Table 3: Flow cell and nanopore sequencing information

| Run_ID | Flow cell_ID | Date | Run time | # Reads | # Bases | Read n50 | Pore type | Flow cell type |
| --- | --- | --- | --- | --- | --- | --- | --- | --- |
| 6e4022dcedc7dc4c9fc842398b69cc2644ca4e56 | FAH96813 | 8/10/18 | 32 h | 171692 | 1710630698 | 33016 | R9.4 | FLO-MIN106 |
| 3b91f2c067bd114d95e4bcf46bc67ce65d205a7f | FAH96813 | 8/13/18 | 8.5 h | 17257 | 116911070 | 24738 | R9.4 | FLO-MIN106 |
| a919b14095aec63f62d48c032c96a1caf1617a4d | FAH98164 | 8/14/18 | 48 h | 202967 | 1662143926 | 25249 | R9.4 | FLO-MIN106 |
| 4e733ca62235ae7fac58ce187dd710ffe001938e | FAJ19876 | 10/9/18 | 19 h | 35756 | 67126575 | 13484 | R9.4 | FLO-MIN106 |
| 98b17b25c0bbfb2f488bf599179e7dfd23670221 | FAK19449 | 11/6/18 | 18 h | 30877 | 341591177 | 49939 | R9.4 | FLO-MIN106 |
| f859fdfa563bee6512b8f487babecf67d02474d7 | FAK20637 | 11/8/18 | 21 h | 75897 | 484867939 | 32801 | R9.4 | FLO-MIN106 |
| 40242f4d51ee4d0952ffce05bba242b0a650a68b | FAK20637 | 11/9/18 | 21.5 h | 14424 | 84091740 | 17517 | R9.4 | FLO-MIN106 |
| e1848c7560bbd909fd721e9806db3602c5faddbc | FAK20750 | 12/3/18 | 23 h | 62409 | 476908347 | 20559 | R9.4 | FLO-MIN106 |
